# Supplementary material for: Changes in body composition and weight during the menopause transition
Source: JCI journal article supplement (doi:10.1172/jci.insight.124865), 2019-03-06
Supplement: sd2 [file 2]

## ICMJE Form for Disclosure of Potential Conflicts of Interest

### Instructions

The purpose of this form is to provide readers of your manuscript with information about your other interests that could influence how they receive and understand your work. The form is designed to be completed electronically and stored electronically. It contains programming that allows appropriate data display. Each author should submit a separate form and is responsible for the accuracy and completeness of the submitted information. The form is in six parts.

#### 1. Identifying information.

#### 2. The work under consideration for publication.

This section asks for information about the work that you have submitted for publication. The time frame for this reporting is that of the work itself, from the initial conception and planning to the present. The requested information is about resources that you received, either directly or indirectly (via your institution), to enable you to complete the work. Checking "No" means that you did the work without receiving any financial support from any third party -- that is, the work was supported by funds from the same institution that pays your salary and that institution did not receive third-party funds with which to pay you. If you or your institution received funds from a third party to support the work, such as a government granting agency, charitable foundation or commercial sponsor, check "Yes".

#### 3. Relevant financial activities outside the submitted work.

This section asks about your financial relationships with entities in the bio-medical arena that could be perceived to influence, or that give the appearance of potentially influencing, what you wrote in the submitted work. You should disclose interactions with ANY entity that could be considered broadly relevant to the work. For example, if your article is about testing an epidermal growth factor receptor (EGFR) antagonist in lung cancer, you should report all associations with entities pursuing diagnostic or therapeutic strategies in cancer in general, not just in the area of EGFR or lung cancer.

Report all sources of revenue paid (or promised to be paid) directly to you or your institution on your behalf over the 36 months prior to submission of the work. This should include all monies from sources with relevance to the submitted work, not just monies from the entity that sponsored the research. Please note that your interactions with the work's sponsor that are outside the submitted work should also be listed here. If there is any question, it is usually better to disclose a relationship than not to do so.

For grants you have received for work outside the submitted work, you should disclose support ONLY from entities that could be perceived to be affected financially by the published work, such as drug companies, or foundations supported by entities that could be perceived to have a financial stake in the outcome. Public funding sources, such as government agencies, charitable foundations or academic institutions, need not be disclosed. For example, if a government agency sponsored a study in which you have been involved and drugs were provided by a pharmaceutical company, you need only list the pharmaceutical company.

#### 4. Intellectual Property.

This section asks about patents and copyrights, whether pending, issued, licensed and/or receiving royalties.

#### 5. Relationships not covered above.

Use this section to report other relationships or activities that readers could perceive to have influenced, or that give the appearance of potentially influencing, what you wrote in the submitted work.

#### Definitions.

**Entity:** government agency, foundation, commercial sponsor, academic institution, etc.

**Grant:** A grant from an entity, generally [but not always] paid to your organization

**Personal Fees:** Monies paid to you for services rendered, generally honoraria, royalties, or fees for consulting, lectures, speakers bureaus, expert testimony, employment, or other affiliations

**Non-Financial Support:** Examples include drugs/equipment supplied by the entity, travel paid by the entity, writing assistance, administrative support, etc.

**Other:** Anything not covered under the previous three boxes

**Pending:** The patent has been filed but not issued

**Issued:** The patent has been issued by the agency

**Licensed:** The patent has been licensed to an entity, whether earning royalties or not

**Royalties:** Funds are coming in to you or your institution due to your patent

## ICMJE Form for Disclosure of Potential Conflicts of Interest

### Section 1. Identifying Information

1. Given Name (First Name)

Gail

2. Surname (Last Name)

Greendale

3. Date

28-November-2018

4. Are you the corresponding author?

☒ Yes ☐ No

5. Manuscript Title

Changes in Body Composition and Weight during the Menopause Transition

6. Manuscript Identifying Number (if you know it)

124865-INS-CMED-TR-2

### Section 2. The Work Under Consideration for Publication

Did you or your institution **at any time** receive payment or services from a third party (government, commercial, private foundation, etc.) for any aspect of the submitted work (including but not limited to grants, data monitoring board, study design, manuscript preparation, statistical analysis, etc.)?

Are there any relevant conflicts of interest? ☐ Yes ☒ No

### Section 3. Relevant financial activities outside the submitted work.

Place a check in the appropriate boxes in the table to indicate whether you have financial relationships (regardless of amount of compensation) with entities as described in the instructions. Use one line for each entity; add as many lines as you need by clicking the "Add +" box. You should report relationships that were **present during the 36 months prior to publication**.

Are there any relevant conflicts of interest? ☐ Yes ☒ No

### Section 4. Intellectual Property – Patents & Copyrights

Do you have any patents, whether planned, pending or issued, broadly relevant to the work? ☐ Yes ☒ No

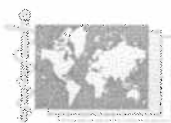

ICMJE

INTERNATIONAL COMMITTEE of  
MEDICAL JOURNAL EDITORS

## ICMJE Form for Disclosure of Potential Conflicts of Interest

### Section 5.

#### Relationships not covered above

Are there other relationships or activities that readers could perceive to have influenced, or that give the appearance of potentially influencing, what you wrote in the submitted work?

- ☐ Yes, the following relationships/conditions/circumstances are present (explain below):
- ☒ No other relationships/conditions/circumstances that present a potential conflict of interest

At the time of manuscript acceptance, journals will ask authors to confirm and, if necessary, update their disclosure statements. On occasion, journals may ask authors to disclose further information about reported relationships.

### Section 6.

#### Disclosure Statement

Based on the above disclosures, this form will automatically generate a disclosure statement, which will appear in the box below.

Dr. Greendale has nothing to disclose.

### Evaluation and Feedback

Please visit <http://www.icmje.org/cgi-bin/feedback> to provide feedback on your experience with completing this form.

## ICMJE Form for Disclosure of Potential Conflicts of Interest

### Section 1. Identifying Information

1. Given Name (First Name)

Barbara

2. Surname (Last Name)

Sternfeld

3. Date

28-November-2018

4. Are you the corresponding author?

☐ Yes ☒ No

Corresponding Author's Name

Gail Greendale

5. Manuscript Title

Changes in Body Composition and Weight during the Menopause Transition

6. Manuscript Identifying Number (if you know it)

124865-INS-CMED-TR-2

### Section 2. The Work Under Consideration for Publication

Did you or your institution **at any time** receive payment or services from a third party (government, commercial, private foundation, etc.) for any aspect of the submitted work (including but not limited to grants, data monitoring board, study design, manuscript preparation, statistical analysis, etc.)?

Are there any relevant conflicts of interest? ☒ Yes ☐ No

If yes, please fill out the appropriate information below. If you have more than one entity press the "ADD" button to add a row. Excess rows can be removed by pressing the "X" button.

| Name of Institution/Company | Grant?                              | Personal Fees?           | Non-Financial Support?   | Other?                   | Comments |
|-----------------------------|-------------------------------------|--------------------------|--------------------------|--------------------------|----------|
| National Institute on Aging | <input checked="" type="checkbox"/> | <input type="checkbox"/> | <input type="checkbox"/> | <input type="checkbox"/> |          |

### Section 3. Relevant financial activities outside the submitted work.

Place a check in the appropriate boxes in the table to indicate whether you have financial relationships (regardless of amount of compensation) with entities as described in the instructions. Use one line for each entity; add as many lines as you need by clicking the "Add +" box. You should report relationships that were **present during the 36 months prior to publication**.

Are there any relevant conflicts of interest? ☐ Yes ☒ No

### Section 4. Intellectual Property – Patents & Copyrights

Do you have any patents, whether planned, pending or issued, broadly relevant to the work? ☐ Yes ☒ No

## ICMJE Form for Disclosure of Potential Conflicts of Interest

### Section 5.

#### Relationships not covered above

Are there other relationships or activities that readers could perceive to have influenced, or that give the appearance of potentially influencing, what you wrote in the submitted work?

- ☐ Yes, the following relationships/conditions/circumstances are present (explain below):
- ☒ No other relationships/conditions/circumstances that present a potential conflict of interest

At the time of manuscript acceptance, journals will ask authors to confirm and, if necessary, update their disclosure statements. On occasion, journals may ask authors to disclose further information about reported relationships.

### Section 6.

#### Disclosure Statement

Based on the above disclosures, this form will automatically generate a disclosure statement, which will appear in the box below.

Dr. Sternfeld reports grants from National Institute on Aging, during the conduct of the study; .

### Evaluation and Feedback

Please visit <http://www.icmje.org/cgi-bin/feedback> to provide feedback on your experience with completing this form.

## ICMJE Form for Disclosure of Potential Conflicts of Interest

### Section 1.

#### Identifying Information

1. Given Name (First Name)

Meihua

2. Surname (Last Name)

Huang

3. Date

27-November-2018

4. Are you the corresponding author?

☐ Yes

☒ No

Corresponding Author's Name

Gail A. Greendale

5. Manuscript Title

Changes in Body Composition and Weight during the Menopause Transition

6. Manuscript Identifying Number (if you know it)

124865-INS-CMED-TR-2

### Section 2.

#### The Work Under Consideration for Publication

Did you or your institution **at any time** receive payment or services from a third party (government, commercial, private foundation, etc.) for any aspect of the submitted work (including but not limited to grants, data monitoring board, study design, manuscript preparation, statistical analysis, etc.)?

Are there any relevant conflicts of interest?

☐ Yes

☒ No

### Section 3.

#### Relevant financial activities outside the submitted work.

Place a check in the appropriate boxes in the table to indicate whether you have financial relationships (regardless of amount of compensation) with entities as described in the instructions. Use one line for each entity; add as many lines as you need by clicking the "Add +" box. You should report relationships that were **present during the 36 months prior to publication**.

Are there any relevant conflicts of interest?

☐ Yes

☒ No

### Section 4.

#### Intellectual Property – Patents & Copyrights

Do you have any patents, whether planned, pending or issued, broadly relevant to the work?

☐ Yes

☒ No

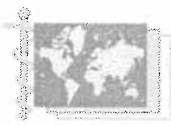

ICMJE

INTERNATIONAL COMMITTEE of  
MEDICAL JOURNAL EDITORS

## ICMJE Form for Disclosure of Potential Conflicts of Interest

### Section 5.

#### Relationships not covered above

Are there other relationships or activities that readers could perceive to have influenced, or that give the appearance of potentially influencing, what you wrote in the submitted work?

- ☐ Yes, the following relationships/conditions/circumstances are present (explain below):
- ☒ No other relationships/conditions/circumstances that present a potential conflict of interest

At the time of manuscript acceptance, journals will ask authors to confirm and, if necessary, update their disclosure statements. On occasion, journals may ask authors to disclose further information about reported relationships.

### Section 6.

#### Disclosure Statement

Based on the above disclosures, this form will automatically generate a disclosure statement, which will appear in the box below.

Dr. Huang has nothing to disclose.

### Evaluation and Feedback

Please visit <http://www.icmje.org/cgi-bin/feedback> to provide feedback on your experience with completing this form.

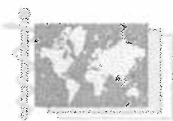

ICMJE

INTERNATIONAL COMMITTEE of  
MEDICAL JOURNAL EDITORS

## ICMJE Form for Disclosure of Potential Conflicts of Interest

### Section 1.

#### Identifying Information

1. Given Name (First Name)

Weijuan

2. Surname (Last Name)

Han

3. Date

06-December-2018

4. Are you the corresponding author?

☒ Yes ☐ No

5. Manuscript Title

Changes in Body Composition and Weight during the Menopause Transition

6. Manuscript Identifying Number (if you know it)

124865-INS-CMED-TR-2

### Section 2.

#### The Work Under Consideration for Publication

Did you or your institution **at any time** receive payment or services from a third party (government, commercial, private foundation, etc.) for any aspect of the submitted work (including but not limited to grants, data monitoring board, study design, manuscript preparation, statistical analysis, etc.)?

Are there any relevant conflicts of interest? ☐ Yes ☒ No

### Section 3.

#### Relevant financial activities outside the submitted work.

Place a check in the appropriate boxes in the table to indicate whether you have financial relationships (regardless of amount of compensation) with entities as described in the instructions. Use one line for each entity; add as many lines as you need by clicking the "Add +" box. You should report relationships that were **present during the 36 months prior to publication**.

Are there any relevant conflicts of interest? ☐ Yes ☒ No

### Section 4.

#### Intellectual Property -- Patents & Copyrights

Do you have any patents, whether planned, pending or issued, broadly relevant to the work? ☐ Yes ☒ No



## ICMJE Form for Disclosure of Potential Conflicts of Interest

### Section 5.

#### Relationships not covered above

Are there other relationships or activities that readers could perceive to have influenced, or that give the appearance of potentially influencing, what you wrote in the submitted work?

- ☐ Yes, the following relationships/conditions/circumstances are present (explain below):
- ☒ No other relationships/conditions/circumstances that present a potential conflict of interest

At the time of manuscript acceptance, journals will ask authors to confirm and, if necessary, update their disclosure statements. On occasion, journals may ask authors to disclose further information about reported relationships.

### Section 6.

#### Disclosure Statement

Based on the above disclosures, this form will automatically generate a disclosure statement, which will appear in the box below.

Ms. Han has nothing to disclose.

### Evaluation and Feedback

Please visit <http://www.icmje.org/cgi-bin/feedback> to provide feedback on your experience with completing this form.

## ICMJE Form for Disclosure of Potential Conflicts of Interest

### Section 1. Identifying Information

1. Given Name (First Name)

Carrie

2. Surname (Last Name)

Karvonen-Gutierrez

3. Date

28-November-2018

4. Are you the corresponding author?

☐ Yes

☒ No

Corresponding Author's Name

Gail Greendale

5. Manuscript Title

Changes in Body Composition and Weight during the Menopause Transition

6. Manuscript Identifying Number (if you know it)

124865-INS-CMED-TR-2

### Section 2. The Work Under Consideration for Publication

Did you or your institution **at any time** receive payment or services from a third party (government, commercial, private foundation, etc.) for any aspect of the submitted work (including but not limited to grants, data monitoring board, study design, manuscript preparation, statistical analysis, etc.)?

Are there any relevant conflicts of interest?

☐ Yes

☒ No

### Section 3. Relevant financial activities outside the submitted work.

Place a check in the appropriate boxes in the table to indicate whether you have financial relationships (regardless of amount of compensation) with entities as described in the instructions. Use one line for each entity; add as many lines as you need by clicking the "Add +" box. You should report relationships that were **present during the 36 months prior to publication**.

Are there any relevant conflicts of interest?

☐ Yes

☒ No

### Section 4. Intellectual Property -- Patents & Copyrights

Do you have any patents, whether planned, pending or issued, broadly relevant to the work?

☐ Yes

☒ No

## ICMJE Form for Disclosure of Potential Conflicts of Interest

### Section 5.

#### Relationships not covered above

Are there other relationships or activities that readers could perceive to have influenced, or that give the appearance of potentially influencing, what you wrote in the submitted work?

- ☐ Yes, the following relationships/conditions/circumstances are present (explain below):
- ☒ No other relationships/conditions/circumstances that present a potential conflict of interest

At the time of manuscript acceptance, journals will ask authors to confirm and, if necessary, update their disclosure statements. On occasion, journals may ask authors to disclose further information about reported relationships.

### Section 6.

#### Disclosure Statement

Based on the above disclosures, this form will automatically generate a disclosure statement, which will appear in the box below.

Dr. Karvonen-Gutierrez has nothing to disclose.

### Evaluation and Feedback

Please visit <http://www.icmje.org/cgi-bin/feedback> to provide feedback on your experience with completing this form.

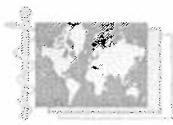

ICMJE

INTERNATIONAL COMMITTEE of  
MEDICAL JOURNAL EDITORS

## ICMJE Form for Disclosure of Potential Conflicts of Interest

### Section 1.

#### Identifying Information

1. Given Name (First Name)

Kristine

2. Surname (Last Name)

Ruppert

3. Date

03-December-2018

4. Are you the corresponding author?

☐ Yes

☒ No

Corresponding Author's Name

Gail A. Greendale

5. Manuscript Title

Changes in Body Composition and Weight during the Menopause Transition

6. Manuscript Identifying Number (if you know it)

124865-INS-CMED-TR-2

### Section 2.

#### The Work Under Consideration for Publication

Did you or your institution **at any time** receive payment or services from a third party (government, commercial, private foundation, etc.) for any aspect of the submitted work (including but not limited to grants, data monitoring board, study design, manuscript preparation, statistical analysis, etc.)?

Are there any relevant conflicts of interest?

☐ Yes

☒ No

### Section 3.

#### Relevant financial activities outside the submitted work.

Place a check in the appropriate boxes in the table to indicate whether you have financial relationships (regardless of amount of compensation) with entities as described in the instructions. Use one line for each entity; add as many lines as you need by clicking the "Add +" box. You should report relationships that were **present during the 36 months prior to publication**.

Are there any relevant conflicts of interest?

☐ Yes

☒ No

### Section 4.

#### Intellectual Property – Patents & Copyrights

Do you have any patents, whether planned, pending or issued, broadly relevant to the work?

☐ Yes

☒ No

## ICMJE Form for Disclosure of Potential Conflicts of Interest

### Section 5.

#### Relationships not covered above

Are there other relationships or activities that readers could perceive to have influenced, or that give the appearance of potentially influencing, what you wrote in the submitted work?

- ☐ Yes, the following relationships/conditions/circumstances are present (explain below):
- ☒ No other relationships/conditions/circumstances that present a potential conflict of interest

At the time of manuscript acceptance, journals will ask authors to confirm and, if necessary, update their disclosure statements. On occasion, journals may ask authors to disclose further information about reported relationships.

### Section 6.

#### Disclosure Statement

Based on the above disclosures, this form will automatically generate a disclosure statement, which will appear in the box below.

Dr. Ruppert has nothing to disclose.

### Evaluation and Feedback

Please visit <http://www.icmje.org/cgi-bin/feedback> to provide feedback on your experience with completing this form.

## ICMJE Form for Disclosure of Potential Conflicts of Interest

### Section 1.

#### Identifying Information

1. Given Name (First Name)

Jane

2. Surname (Last Name)

Cauley

3. Date

28-November-2018

4. Are you the corresponding author?

☐ Yes

☒ No

Corresponding Author's Name

5. Manuscript Title

Changes in Body Composition and Weight during the Menopause Transition

6. Manuscript Identifying Number (if you know it)

124865-INS-CMED-TR-2

### Section 2.

#### The Work Under Consideration for Publication

Did you or your institution **at any time** receive payment or services from a third party (government, commercial, private foundation, etc.) for any aspect of the submitted work (including but not limited to grants, data monitoring board, study design, manuscript preparation, statistical analysis, etc.)?

Are there any relevant conflicts of interest?

☐ Yes

☒ No

### Section 3.

#### Relevant financial activities outside the submitted work.

Place a check in the appropriate boxes in the table to indicate whether you have financial relationships (regardless of amount of compensation) with entities as described in the instructions. Use one line for each entity; add as many lines as you need by clicking the "Add +" box. You should report relationships that were **present during the 36 months prior to publication**.

Are there any relevant conflicts of interest?

☐ Yes

☒ No

### Section 4.

#### Intellectual Property – Patents & Copyrights

Do you have any patents, whether planned, pending or issued, broadly relevant to the work?

☐ Yes

☒ No

## ICMJE Form for Disclosure of Potential Conflicts of Interest

### Section 5.

#### Relationships not covered above

Are there other relationships or activities that readers could perceive to have influenced, or that give the appearance of potentially influencing, what you wrote in the submitted work?

- ☐ Yes, the following relationships/conditions/circumstances are present (explain below):
- ☒ No other relationships/conditions/circumstances that present a potential conflict of interest

At the time of manuscript acceptance, journals will ask authors to confirm and, if necessary, update their disclosure statements. On occasion, journals may ask authors to disclose further information about reported relationships.

### Section 6.

#### Disclosure Statement

Based on the above disclosures, this form will automatically generate a disclosure statement, which will appear in the box below.

Dr. Cauley has nothing to disclose.

### Evaluation and Feedback

Please visit <http://www.icmje.org/cgi-bin/feedback> to provide feedback on your experience with completing this form.

## ICMJE Form for Disclosure of Potential Conflicts of Interest

### Section 1.

#### Identifying Information

1. Given Name (First Name)

Joel

2. Surname (Last Name)

Finkelstein

3. Date

28-November-2018

4. Are you the corresponding author?

☐ Yes ☒ No

Corresponding Author's Name

Gail A Greendale

5. Manuscript Title

Changes in Body Composition and Weight during the Menopause Transition

6. Manuscript Identifying Number (if you know it)

124865-INS-CMED-TR-2

### Section 2.

#### The Work Under Consideration for Publication

Did you or your institution **at any time** receive payment or services from a third party (government, commercial, private foundation, etc.) for any aspect of the submitted work (including but not limited to grants, data monitoring board, study design, manuscript preparation, statistical analysis, etc.)?

Are there any relevant conflicts of interest? ☐ Yes ☒ No

### Section 3.

#### Relevant financial activities outside the submitted work.

Place a check in the appropriate boxes in the table to indicate whether you have financial relationships (regardless of amount of compensation) with entities as described in the instructions. Use one line for each entity; add as many lines as you need by clicking the "Add +" box. You should report relationships that were **present during the 36 months prior to publication**.

Are there any relevant conflicts of interest? ☐ Yes ☒ No

### Section 4.

#### Intellectual Property – Patents & Copyrights

Do you have any patents, whether planned, pending or issued, broadly relevant to the work? ☐ Yes ☒ No



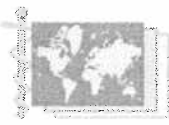

ICMJE

INTERNATIONAL COMMITTEE of  
MEDICAL JOURNAL EDITORS

## ICMJE Form for Disclosure of Potential Conflicts of Interest

### Section 5.

#### Relationships not covered above

Are there other relationships or activities that readers could perceive to have influenced, or that give the appearance of potentially influencing, what you wrote in the submitted work?

- ☐ Yes, the following relationships/conditions/circumstances are present (explain below):
- ☒ No other relationships/conditions/circumstances that present a potential conflict of interest

At the time of manuscript acceptance, journals will ask authors to confirm and, if necessary, update their disclosure statements. On occasion, journals may ask authors to disclose further information about reported relationships.

### Section 6.

#### Disclosure Statement

Based on the above disclosures, this form will automatically generate a disclosure statement, which will appear in the box below.

Dr. Finkelstein has nothing to disclose.

### Evaluation and Feedback

Please visit <http://www.icmje.org/cgi-bin/feedback> to provide feedback on your experience with completing this form.

## ICMJE Form for Disclosure of Potential Conflicts of Interest

### Section 1. Identifying Information

1. Given Name (First Name)

Sheng-Fang

2. Surname (Last Name)

Jiang

3. Date

06-December-2018

4. Are you the corresponding author?

☐

Yes

☒

No

Corresponding Author's Name

Gail Greendale

5. Manuscript Title

Changes in Body Composition and Weight during the Menopause Transition

6. Manuscript Identifying Number (if you know it)

124865-INS-CMED-TR-2

### Section 2. The Work Under Consideration for Publication

Did you or your institution **at any time** receive payment or services from a third party (government, commercial, private foundation, etc.) for any aspect of the submitted work (including but not limited to grants, data monitoring board, study design, manuscript preparation, statistical analysis, etc.)?

Are there any relevant conflicts of interest?

☐

Yes

☒

No

### Section 3. Relevant financial activities outside the submitted work.

Place a check in the appropriate boxes in the table to indicate whether you have financial relationships (regardless of amount of compensation) with entities as described in the instructions. Use one line for each entity; add as many lines as you need by clicking the "Add +" box. You should report relationships that were **present during the 36 months prior to publication**.

Are there any relevant conflicts of interest?

☐

Yes

☒

No

### Section 4. Intellectual Property – Patents & Copyrights

Do you have any patents, whether planned, pending or issued, broadly relevant to the work? ☐ Yes

☒

No

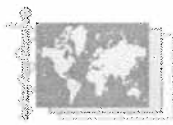

ICMJE

INTERNATIONAL COMMITTEE of  
MEDICAL JOURNAL EDITORS

## ICMJE Form for Disclosure of Potential Conflicts of Interest

### Section 5.

#### Relationships not covered above

Are there other relationships or activities that readers could perceive to have influenced, or that give the appearance of potentially influencing, what you wrote in the submitted work?

- ☐ Yes, the following relationships/conditions/circumstances are present (explain below):
- ☒ No other relationships/conditions/circumstances that present a potential conflict of interest

At the time of manuscript acceptance, journals will ask authors to confirm and, if necessary, update their disclosure statements. On occasion, journals may ask authors to disclose further information about reported relationships.

### Section 6.

#### Disclosure Statement

Based on the above disclosures, this form will automatically generate a disclosure statement, which will appear in the box below.

Dr. Jiang has nothing to disclose.

### Evaluation and Feedback

Please visit <http://www.icmje.org/cgi-bin/feedback> to provide feedback on your experience with completing this form.

## ICMJE Form for Disclosure of Potential Conflicts of Interest

### Section 1.

#### Identifying Information

1. Given Name (First Name)

Arun

2. Surname (Last Name)

Karlamangla

3. Date

03-December-2018

4. Are you the corresponding author?

☐

Yes

☒

No

Corresponding Author's Name

Gail A. Greendale

5. Manuscript Title

Changes in Body Composition and Weight during the Menopause Transition

6. Manuscript Identifying Number (if you know it)

124865-INS-CMED-TR-2

### Section 2.

#### The Work Under Consideration for Publication

Did you or your institution **at any time** receive payment or services from a third party (government, commercial, private foundation, etc.) for any aspect of the submitted work (including but not limited to grants, data monitoring board, study design, manuscript preparation, statistical analysis, etc.)?

Are there any relevant conflicts of interest?

☐

Yes

☒

No

### Section 3.

#### Relevant financial activities outside the submitted work.

Place a check in the appropriate boxes in the table to indicate whether you have financial relationships (regardless of amount of compensation) with entities as described in the instructions. Use one line for each entity; add as many lines as you need by clicking the "Add +" box. You should report relationships that were **present during the 36 months prior to publication**.

Are there any relevant conflicts of interest?

☐

Yes

☒

No

### Section 4.

#### Intellectual Property – Patents & Copyrights

Do you have any patents, whether planned, pending or issued, broadly relevant to the work?

☐

Yes

☒

No

## ICMJE Form for Disclosure of Potential Conflicts of Interest

### Section 5.

#### Relationships not covered above

Are there other relationships or activities that readers could perceive to have influenced, or that give the appearance of potentially influencing, what you wrote in the submitted work?

- ☐ Yes, the following relationships/conditions/circumstances are present (explain below):
- ☒ No other relationships/conditions/circumstances that present a potential conflict of interest

At the time of manuscript acceptance, journals will ask authors to confirm and, if necessary, update their disclosure statements. On occasion, journals may ask authors to disclose further information about reported relationships.

### Section 6.

#### Disclosure Statement

Based on the above disclosures, this form will automatically generate a disclosure statement, which will appear in the box below.

Dr. Karlamangla has nothing to disclose.

### Evaluation and Feedback

Please visit <http://www.icmje.org/cgi-bin/feedback> to provide feedback on your experience with completing this form.

**STROBE COHORT CHECKLIST**  
**Changes in Body Composition and Weight During the Menopause Transition**  
**JCI Insight ms. 124865-INS-CMED-TR-2**

| Element                      | Item No | Recommendation<br><i>In italics are comments relevant to this manuscript</i>                                                                                                                                                                                                                                                                                                                                                 | Page or Table/Figure Location |
|------------------------------|---------|------------------------------------------------------------------------------------------------------------------------------------------------------------------------------------------------------------------------------------------------------------------------------------------------------------------------------------------------------------------------------------------------------------------------------|-------------------------------|
| <b>Title and abstract</b>    | 1       | (a) Indicate the study's design with a commonly used term in the title or the abstract                                                                                                                                                                                                                                                                                                                                       | 4                             |
|                              |         | (b) Provide in the abstract an informative and balanced summary of what was done and what was found                                                                                                                                                                                                                                                                                                                          | 4                             |
| <b>Introduction</b>          |         |                                                                                                                                                                                                                                                                                                                                                                                                                              |                               |
| Background/rationale         | 2       | Explain the scientific background and rationale for the investigation being reported                                                                                                                                                                                                                                                                                                                                         | 5                             |
| Objectives                   | 3       | State specific objectives, including any prespecified hypotheses                                                                                                                                                                                                                                                                                                                                                             | 5-6                           |
| <b>Methods</b>               |         |                                                                                                                                                                                                                                                                                                                                                                                                                              |                               |
| Study design                 | 4       | Present key elements of study design early in the paper<br><i>COMMENT: JCI Insight mandates that methods follow the results. Therefore, design elements come later in the paper by journal requisite.</i>                                                                                                                                                                                                                    | 19-23                         |
| Setting                      | 5       | Describe the setting, locations, and relevant dates, including periods of recruitment, exposure, follow-up, and data collection<br><i>COMMENT: Originally, we did not include the calendar years of baseline visit and the last included follow-up visit in this analysis. We added this information to page 19.</i>                                                                                                         | 19                            |
| Participants                 | 6       | (a) Give the eligibility criteria, and the sources and methods of selection of participants. Describe methods of follow-up                                                                                                                                                                                                                                                                                                   | 19                            |
|                              |         | (b) For matched studies, give matching criteria and number of exposed and unexposed                                                                                                                                                                                                                                                                                                                                          | N/A                           |
| Variables                    | 7       | Clearly define all outcomes, exposures, predictors, potential confounders, and effect modifiers. Give diagnostic criteria, if applicable                                                                                                                                                                                                                                                                                     | 19-21                         |
| Data sources/<br>measurement | 8*      | For each variable of interest, give sources of data and details of methods of assessment (measurement). Describe comparability of assessment methods if there is more than one group                                                                                                                                                                                                                                         | 19-21                         |
| Bias                         | 9       | Describe any efforts to address potential sources of bias<br><i>COMMENT: A main risk of bias is the restriction to final menstrual period (FMP) sample an (unavoidable restriction of the analytic design). We checked demographic and body composition characteristics of the full body composition cohort and of those who had an FMP. These characteristics were quite similar. We added this information to results.</i> | 6                             |
| Study size                   | 10      | Explain how the study size was arrived at                                                                                                                                                                                                                                                                                                                                                                                    | 19                            |
| Quantitative variables       | 11      | Explain how quantitative variables were handled in the analyses. If applicable, describe which groupings were chosen and why                                                                                                                                                                                                                                                                                                 | 21-22                         |
| Statistical methods          | 12      | (a) Describe all statistical methods, including those used to control for confounding                                                                                                                                                                                                                                                                                                                                        | 19-23                         |
|                              |         | (b) Describe any methods used to examine subgroups and interactions<br><i>COMMENT: We described effects of race/ethnicity on page 23. We did not perform any interacted analyses.</i>                                                                                                                                                                                                                                        | 23                            |
|                              |         | (c) Explain how missing data were addressed<br><i>COMMENT: The only model covariate for which we had missingness was hormone therapy use, but missingness was rare. We added this information to the methods.</i>                                                                                                                                                                                                            | 21                            |

|                  |     |                                                                                                                                                                                                                                                                                                                                                                                                                                                                                                                                                                                                                                                                                                                      |                                 |
|------------------|-----|----------------------------------------------------------------------------------------------------------------------------------------------------------------------------------------------------------------------------------------------------------------------------------------------------------------------------------------------------------------------------------------------------------------------------------------------------------------------------------------------------------------------------------------------------------------------------------------------------------------------------------------------------------------------------------------------------------------------|---------------------------------|
|                  |     | (d) If applicable, explain how loss to follow-up was addressed<br><i>COMMENT: We did not invoke any specific methods to address loss to follow up. However, we added information about the median number of visits, which indicates a very stable sample composition (see also item 14c).</i>                                                                                                                                                                                                                                                                                                                                                                                                                        | 6                               |
|                  |     | (e) Describe any sensitivity analyses                                                                                                                                                                                                                                                                                                                                                                                                                                                                                                                                                                                                                                                                                | Not done                        |
| <b>Results</b>   |     |                                                                                                                                                                                                                                                                                                                                                                                                                                                                                                                                                                                                                                                                                                                      |                                 |
| Participants     | 13* | (a) Report numbers of individuals at each stage of study—eg numbers potentially eligible, examined for eligibility, confirmed eligible, included in the study, completing follow-up, and analysed                                                                                                                                                                                                                                                                                                                                                                                                                                                                                                                    | 19<br>Figure 3                  |
|                  |     | (b) Give reasons for non-participation at each stage                                                                                                                                                                                                                                                                                                                                                                                                                                                                                                                                                                                                                                                                 | 19<br>Figure 3                  |
|                  |     | (c) Consider use of a flow diagram                                                                                                                                                                                                                                                                                                                                                                                                                                                                                                                                                                                                                                                                                   | Figure 3                        |
| Descriptive data | 14* | (a) Give characteristics of study participants (eg demographic, clinical, social) and information on exposures and potential confounders                                                                                                                                                                                                                                                                                                                                                                                                                                                                                                                                                                             | 6<br>Table 1                    |
|                  |     | (b) Indicate number of participants with missing data for each variable of interest<br><i>COMMENT: The losses of participants to the analytical sample (due to missing, required data elements) are shown in Figure 3.</i><br><i>Because this is a longitudinal, repeated measures analysis, one does not lose participants due to missing data; one loses observations. After the creation of the analytic sample, there were no missing data for age at FMP or race/ethnicity, the variables of interest reported in Tables 2-4; thus, no observations were lost on their account. As noted above, we did lose 56 (0.5%) observations due to missing data on hormone use.</i>                                      | 19<br>Figure 3                  |
|                  |     | (c) Summarise follow-up time (eg, average and total amount)<br><i>COMMENT: The calendar start (baseline) and stop time (follow-up visit 13) is presented in the methods. We provide the number of observations per woman (along with maximum observations possible). See new information on pp 6 and 19.</i>                                                                                                                                                                                                                                                                                                                                                                                                         | 6, 19                           |
| Outcome data     | 15* | Report numbers of outcome events or summary measures over time<br><i>COMMENT: Outcomes are continuous variables not discrete events</i>                                                                                                                                                                                                                                                                                                                                                                                                                                                                                                                                                                              | N/A                             |
| Main results     | 16  | Give unadjusted estimates and, if applicable, confounder-adjusted estimates and their precision (eg 95% confidence interval). Make clear which confounders were adjusted for and why they were included<br><i>COMMENT: We believe that presenting unadjusted longitudinal models (outcomes in relation to FMP time only) would be uninformative; our covariates are exposures of interest, not confounders. (Commonly, an unadjusted vs adjusted analysis is presented to gauge the effect of confounders).</i><br><i>The crude relation between each outcome and FMP time is depicted in the LOESS plots (Figure 1), with the caveat that these are repeated cross-sectional estimates, as noted in the legend.</i> | Figure 1                        |
|                  |     | (b) Report category boundaries when continuous variables were categorized                                                                                                                                                                                                                                                                                                                                                                                                                                                                                                                                                                                                                                            | N/A                             |
|                  |     | (c) If relevant, consider translating estimates of relative risk into absolute risk for a meaningful time period<br><i>COMMENT: Tables 2-4 contain absolute risk for average White woman and relative risks for other ethnic groups or specific exposures. Absolute risks are elaborated in the results text.</i>                                                                                                                                                                                                                                                                                                                                                                                                    | Tables 2- 4<br>Figure 2<br>7-12 |

|                          |    |                                                                                                                                                                                |       |
|--------------------------|----|--------------------------------------------------------------------------------------------------------------------------------------------------------------------------------|-------|
| Other analyses           | 17 | Report other analyses done—eg analyses of subgroups and interactions, and sensitivity analyses                                                                                 | N/A   |
| <b>Discussion</b>        |    |                                                                                                                                                                                |       |
| Key results              | 18 | Summarise key results with reference to study objectives<br><i>COMMENT: In the results section, we use subheadings to identify the results related to each study objective</i> | 6-12  |
| Limitations              | 19 | Discuss limitations of the study, taking into account sources of potential bias or imprecision. Discuss both direction and magnitude of any potential bias                     | 17-18 |
| Interpretation           | 20 | Give a cautious overall interpretation of results considering objectives, limitations, multiplicity of analyses, results from similar studies, and other relevant evidence     | 18    |
| Generalisability         | 21 | Discuss the generalisability (external validity) of the study results                                                                                                          | 18    |
| <b>Other information</b> |    |                                                                                                                                                                                |       |
| Funding                  | 22 | Give the source of funding and the role of the funders for the present study and, if applicable, for the original study on which the present article is based                  | 24    |

\*Give information separately for exposed and unexposed groups.

**Note:** An Explanation and Elaboration article discusses each checklist item and gives methodological background and published examples of transparent reporting. The STROBE checklist is best used in conjunction with this article (freely available on the Web sites of PLoS Medicine at <http://www.plosmedicine.org/>, Annals of Internal Medicine at <http://www.annals.org/>, and Epidemiology at <http://www.epidem.com/>). Information on the STROBE Initiative is available at <http://www.strobe-statement.org>.



**STROBE COHORT CHECKLIST**  
**Changes in Body Composition and Weight During the Menopause Transition**  
**JCI Insight ms. 124865-INS-CMED-TR-2**

| Element                      | Item No | Recommendation<br><i>In italics are comments relevant to this manuscript</i>                                                                                                                                                                                                                                                                                                                                                 | Page or Table/Figure Location |
|------------------------------|---------|------------------------------------------------------------------------------------------------------------------------------------------------------------------------------------------------------------------------------------------------------------------------------------------------------------------------------------------------------------------------------------------------------------------------------|-------------------------------|
| <b>Title and abstract</b>    | 1       | (a) Indicate the study's design with a commonly used term in the title or the abstract                                                                                                                                                                                                                                                                                                                                       | 4                             |
|                              |         | (b) Provide in the abstract an informative and balanced summary of what was done and what was found                                                                                                                                                                                                                                                                                                                          | 4                             |
| <b>Introduction</b>          |         |                                                                                                                                                                                                                                                                                                                                                                                                                              |                               |
| Background/rationale         | 2       | Explain the scientific background and rationale for the investigation being reported                                                                                                                                                                                                                                                                                                                                         | 5                             |
| Objectives                   | 3       | State specific objectives, including any prespecified hypotheses                                                                                                                                                                                                                                                                                                                                                             | 5-6                           |
| <b>Methods</b>               |         |                                                                                                                                                                                                                                                                                                                                                                                                                              |                               |
| Study design                 | 4       | Present key elements of study design early in the paper<br><i>COMMENT: JCI Insight mandates that methods follow the results. Therefore, design elements come later in the paper by journal requisite.</i>                                                                                                                                                                                                                    | 19-23                         |
| Setting                      | 5       | Describe the setting, locations, and relevant dates, including periods of recruitment, exposure, follow-up, and data collection<br><i>COMMENT: Originally, we did not include the calendar years of baseline visit and the last included follow-up visit in this analysis. We added this information to page 19.</i>                                                                                                         | 19                            |
| Participants                 | 6       | (a) Give the eligibility criteria, and the sources and methods of selection of participants. Describe methods of follow-up                                                                                                                                                                                                                                                                                                   | 19                            |
|                              |         | (b) For matched studies, give matching criteria and number of exposed and unexposed                                                                                                                                                                                                                                                                                                                                          | N/A                           |
| Variables                    | 7       | Clearly define all outcomes, exposures, predictors, potential confounders, and effect modifiers. Give diagnostic criteria, if applicable                                                                                                                                                                                                                                                                                     | 19-21                         |
| Data sources/<br>measurement | 8*      | For each variable of interest, give sources of data and details of methods of assessment (measurement). Describe comparability of assessment methods if there is more than one group                                                                                                                                                                                                                                         | 19-21                         |
| Bias                         | 9       | Describe any efforts to address potential sources of bias<br><i>COMMENT: A main risk of bias is the restriction to final menstrual period (FMP) sample an (unavoidable restriction of the analytic design). We checked demographic and body composition characteristics of the full body composition cohort and of those who had an FMP. These characteristics were quite similar. We added this information to results.</i> | 6                             |
| Study size                   | 10      | Explain how the study size was arrived at                                                                                                                                                                                                                                                                                                                                                                                    | 19                            |
| Quantitative variables       | 11      | Explain how quantitative variables were handled in the analyses. If applicable, describe which groupings were chosen and why                                                                                                                                                                                                                                                                                                 | 21-22                         |
| Statistical methods          | 12      | (a) Describe all statistical methods, including those used to control for confounding                                                                                                                                                                                                                                                                                                                                        | 19-23                         |
|                              |         | (b) Describe any methods used to examine subgroups and interactions<br><i>COMMENT: We described effects of race/ethnicity on page 23. We did not perform any interacted analyses.</i>                                                                                                                                                                                                                                        | 23                            |
|                              |         | (c) Explain how missing data were addressed<br><i>COMMENT: The only model covariate for which we had missingness was hormone therapy use, but missingness was rare. We added this information to the methods.</i>                                                                                                                                                                                                            | 21                            |

|                  |     |                                                                                                                                                                                                                                                                                                                                                                                                                                                                                                                                                                                                                                                                                                                      |                                 |
|------------------|-----|----------------------------------------------------------------------------------------------------------------------------------------------------------------------------------------------------------------------------------------------------------------------------------------------------------------------------------------------------------------------------------------------------------------------------------------------------------------------------------------------------------------------------------------------------------------------------------------------------------------------------------------------------------------------------------------------------------------------|---------------------------------|
|                  |     | (d) If applicable, explain how loss to follow-up was addressed<br><i>COMMENT: We did not invoke any specific methods to address loss to follow up. However, we added information about the median number of visits, which indicates a very stable sample composition (see also item 14c).</i>                                                                                                                                                                                                                                                                                                                                                                                                                        | 6                               |
|                  |     | (e) Describe any sensitivity analyses                                                                                                                                                                                                                                                                                                                                                                                                                                                                                                                                                                                                                                                                                | Not done                        |
| <b>Results</b>   |     |                                                                                                                                                                                                                                                                                                                                                                                                                                                                                                                                                                                                                                                                                                                      |                                 |
| Participants     | 13* | (a) Report numbers of individuals at each stage of study—eg numbers potentially eligible, examined for eligibility, confirmed eligible, included in the study, completing follow-up, and analysed                                                                                                                                                                                                                                                                                                                                                                                                                                                                                                                    | 19<br>Figure 3                  |
|                  |     | (b) Give reasons for non-participation at each stage                                                                                                                                                                                                                                                                                                                                                                                                                                                                                                                                                                                                                                                                 | 19<br>Figure 3                  |
|                  |     | (c) Consider use of a flow diagram                                                                                                                                                                                                                                                                                                                                                                                                                                                                                                                                                                                                                                                                                   | Figure 3                        |
| Descriptive data | 14* | (a) Give characteristics of study participants (eg demographic, clinical, social) and information on exposures and potential confounders                                                                                                                                                                                                                                                                                                                                                                                                                                                                                                                                                                             | 6<br>Table 1                    |
|                  |     | (b) Indicate number of participants with missing data for each variable of interest<br><i>COMMENT: The losses of participants to the analytical sample (due to missing, required data elements) are shown in Figure 3.</i><br><i>Because this is a longitudinal, repeated measures analysis, one does not lose participants due to missing data; one loses observations. After the creation of the analytic sample, there were no missing data for age at FMP or race/ethnicity, the variables of interest reported in Tables 2-4; thus, no observations were lost on their account. As noted above, we did lose 56 (0.5%) observations due to missing data on hormone use.</i>                                      | 19<br>Figure 3                  |
|                  |     | (c) Summarise follow-up time (eg, average and total amount)<br><i>COMMENT: The calendar start (baseline) and stop time (follow-up visit 13) is presented in the methods. We provide the number of observations per woman (along with maximum observations possible). See new information on pp 6 and 19.</i>                                                                                                                                                                                                                                                                                                                                                                                                         | 6, 19                           |
| Outcome data     | 15* | Report numbers of outcome events or summary measures over time<br><i>COMMENT: Outcomes are continuous variables not discrete events</i>                                                                                                                                                                                                                                                                                                                                                                                                                                                                                                                                                                              | N/A                             |
| Main results     | 16  | Give unadjusted estimates and, if applicable, confounder-adjusted estimates and their precision (eg 95% confidence interval). Make clear which confounders were adjusted for and why they were included<br><i>COMMENT: We believe that presenting unadjusted longitudinal models (outcomes in relation to FMP time only) would be uninformative; our covariates are exposures of interest, not confounders. (Commonly, an unadjusted vs adjusted analysis is presented to gauge the effect of confounders).</i><br><i>The crude relation between each outcome and FMP time is depicted in the LOESS plots (Figure 1), with the caveat that these are repeated cross-sectional estimates, as noted in the legend.</i> | Figure 1                        |
|                  |     | (b) Report category boundaries when continuous variables were categorized                                                                                                                                                                                                                                                                                                                                                                                                                                                                                                                                                                                                                                            | N/A                             |
|                  |     | (c) If relevant, consider translating estimates of relative risk into absolute risk for a meaningful time period<br><i>COMMENT: Tables 2-4 contain absolute risk for average White woman and relative risks for other ethnic groups or specific exposures. Absolute risks are elaborated in the results text.</i>                                                                                                                                                                                                                                                                                                                                                                                                    | Tables 2- 4<br>Figure 2<br>7-12 |

|                          |    |                                                                                                                                                                                |       |
|--------------------------|----|--------------------------------------------------------------------------------------------------------------------------------------------------------------------------------|-------|
| Other analyses           | 17 | Report other analyses done—eg analyses of subgroups and interactions, and sensitivity analyses                                                                                 | N/A   |
| <b>Discussion</b>        |    |                                                                                                                                                                                |       |
| Key results              | 18 | Summarise key results with reference to study objectives<br><i>COMMENT: In the results section, we use subheadings to identify the results related to each study objective</i> | 6-12  |
| Limitations              | 19 | Discuss limitations of the study, taking into account sources of potential bias or imprecision. Discuss both direction and magnitude of any potential bias                     | 17-18 |
| Interpretation           | 20 | Give a cautious overall interpretation of results considering objectives, limitations, multiplicity of analyses, results from similar studies, and other relevant evidence     | 18    |
| Generalisability         | 21 | Discuss the generalisability (external validity) of the study results                                                                                                          | 18    |
| <b>Other information</b> |    |                                                                                                                                                                                |       |
| Funding                  | 22 | Give the source of funding and the role of the funders for the present study and, if applicable, for the original study on which the present article is based                  | 24    |

\*Give information separately for exposed and unexposed groups.

**Note:** An Explanation and Elaboration article discusses each checklist item and gives methodological background and published examples of transparent reporting. The STROBE checklist is best used in conjunction with this article (freely available on the Web sites of PLoS Medicine at <http://www.plosmedicine.org/>, Annals of Internal Medicine at <http://www.annals.org/>, and Epidemiology at <http://www.epidem.com/>). Information on the STROBE Initiative is available at <http://www.strobe-statement.org>.
